# Supplementary material
Source: PubMed Central journal article supplement (PMC3686098)
Supplement: NIHMS466498-supplement-supplementary_material.pdf [file NIHMS466498-supplement-supplementary_material.pdf]

# **Monetary Reward Processing in Obese Individuals With and Without Binge Eating Disorder**

## *Supplemental Information*

### **Supplemental Methods**

#### **Participants Continued**

Eligibility criteria included that participants had no head injury or medical condition. Participants were excluded if they met any of the following criteria: pregnant, breast-feeding, color-blind, currently taking antidepressant medication or migraine medication, history of cardiovascular disease, blood pressure > 145/90, bipolar disorder, psychosis, current substance-use disorder, history of seizure or neurologic disease, uncontrolled hypertension or diabetes.

All participants were native English speakers (demographic measures are displayed in Table 1). Participants consisted of a community sample recruited through advertisements and flyerings in the New Haven area. Co-occurring disorders were assessed via a Structured Clinical Interview for DSM-IV Disorders (SCID; (1)). Five individuals each in the binge eating disorder (BED) group and obese (OB) group and none in the lean control (LC) group identified as smokers. In the BED group, nine individuals met criteria for a past mood disorder and five for past anxiety disorder; of these, one individual met current criteria for mood and one for anxiety disorders. In the OB group, four individuals met criteria for past mood disorder, two for past anxiety disorder, and one for past alcohol abuse. In the LC group, one individual met criteria for past alcohol, marijuana and cocaine abuse. Only the BED group completed the Eating Disorders Examination Interview. This protocol was approved by the Yale University School of Medicine Human Investigations Committee, and all participants provided written informed consent.

### **Monetary Incentive Delay Task (MIDT) fMRI Task**

Participants completed two runs of the MIDT task, each consisting of 55 trials, lasting 12 seconds each (2). Each trial consisted of two anticipatory periods (A1 and A2) and one outcome phase (OC). During the A1 phase, participants viewed a cue (duration: 1000 milliseconds) signaling the potential win or loss of a specific amount of money (either \$1 or \$5) and then fixated on a crosshair (variable delay of 3-5 seconds). In the A2 phase, a target appeared on the screen (variable duration) and participants pressed a button and then fixated on a crosshair (variable delay of 4-6 seconds). Finally, in the outcome phase, participants received feedback (duration: 1200 milliseconds) on the win or loss of money and also viewed their cumulative earnings on the task.

fMRI volume acquisitions were time-locked to the offset of each cue and trial types were pseudorandomly ordered within each session. Task difficulty was based on practice reaction times collected prior to the scanning session and set so that participants would experience a positive outcome on 66 of trials. All participants were informed that their compensation on the task was performance-based.

The current task has been adapted from the original MIDT (3) in several ways. First, the anticipatory phase was segregated into two periods, with A1 corresponding to the prospect of reward/loss and A2 associated with the anticipation of the reward/loss. Second, the abstract cues to signal the potential win or loss of money were replaced with the actual words (e.g. “Win \$1” or “Lose \$5”) in order to minimize working memory components of the task. Third, a neutral stimulus of “Win \$0” or “Lose \$0” was included to counterbalance conditions. Fourth, in order to separate each task phase, every period was extended by several seconds. Fifth, the motoric

demands associated with pressing a button were contained in the A2 phase, while the motor preparation was contained in the A1 phase.

### **Image Acquisition and Analysis**

Images were obtained using 2 Siemens TIM Trio 3T MRI systems. To minimize potential cross-scanner differences, an equal number of individuals from each experimental group were collected across scanners. Additionally, to control for potential scanner effects, this variable was added as a covariate in all group contrast analyses. Localizer images were acquired aligning the eighth slice parallel to the plane transecting the anterior and posterior commissures. Functional images were acquired with a T2\*-weighed blood oxygen level dependent sequence with a TR of 1500 ms, TE of 27 ms, flip angle of 60°, 64 x 64 in-plane matrix, field of view of 220 x 220 and 25 4-mm slices with 1 mm skip. High-resolution 3D MPRAGE structural images were also acquired with a TR of 2530 ms, TE of 3.34 ms, flip angle of 7°, 256 x 256 in-plane matrix, and 176 1-mm slices. Each MIDT fMRI run consisted of 486 volumes, including an initial rest period of 9 seconds for signal stability, which was subsequently removed from analyses. Statistical analyses used a robust general linear model approach and each phase of each trial type was separately modeled. Analyses combined “Win \$1” and “Win \$5” trials, “Lose \$1” and “Lose \$5” trials, and “Win \$0” and “Lose \$0” trials in reward, penalty and neutral conditions in order to increase power.

### **Experimental Procedure**

Participants completed a practice version of the MIDT before entering the scanner in order to familiarize individuals with the task and minimize learning effects. Additionally, the

practice session served to calibrate the computerized task so that in the scanner each individual would win on approximately 66% of trials. All participants were informed that their reimbursement would be influenced by their in-scanner performance. In the scanner, individuals completed the MIDT in two 10-minute sessions. Following each session, participants rated, on a 4-point Likert scale, specific emotions associated with each of the cue presentations (e.g. ‘Happy’ or ‘Sad’).

## **Supplemental Results**

### **Main Effects**

Main effects of the MIDT related to specific task phases are reported across all three groups in Table S1.

### **Affective Responses**

A diagnostic-group-by-trial-type repeated-measures analysis of variance (ANOVA) examining affective responses to the incentive value of different trial types (winning, neutral, losing) showed a main effect of trial type [ $F_{(2,108)} = 298.98, p < 0.001$ ]. Pairwise comparisons revealed that, in a stepwise fashion, participants reported significantly greater cue-elicited “happiness” when winning, during neutral or losing trials ( $p < 0.01$ ). There was no significant difference in affective ratings between the experimental groups [ $F_{(2,54)} = 0.52, p > 0.05$ ] and no diagnostic-group-by-trial-type interaction [ $F_{(4,108)} = 0.76, p > 0.05$ ].

## **In-Scanner Behavior**

Multiple one-way ANOVAs examining behavioral responses in-scanner showed no significant group differences between experimental groups on earnings [ $F_{(2,111)} = 3.02, p > 0.05$ ] or mean hit rate for win/loss trials [ $F_{(2,111)} = 2.71, p > 0.05$ ]. There was, however, a significant between-group difference in mean reaction time on win/loss trials [ $F_{(2,111)} = 4.75, p < 0.05$ ], whereby the LC group had significantly shorter reaction times than the BED group ( $p < 0.05$ ), but did not differ from the OB group ( $p > 0.05$ ).

## **Group Differences**

While the findings listed in the text of the manuscript focus on brain regions implicated in reward processing and hypothesized to differ between groups, additional findings are listed below (as well as in accompanying tables).

### **Group Differences: BED vs OB**

#### *A1Win*

Between-group BED-OB contrasts of neural activity during the A1Win phase showed significantly increased activity in the BED, relative to the OB group, in the left IFG extending to the insula, the right middle frontal gyrus extending to the inferior frontal gyrus, the caudate and putamen; right precentral gyrus extending to the postcentral gyrus and insula (Table 2A).

#### *A1Loss*

In the A1Loss phase BED-OB contrasts demonstrated significantly increased activity in the left IFG extending to the insula and prefrontal gyrus (Table 2A).

### **Group Differences: BED vs LC**

#### *A1Win*

No significant differences between BED and LC groups were observed during this phase (Table 2B).

#### *A1Loss*

Between-group contrasts of neural activity in the BED group, relative to the LC group, showed significantly increased activity in the right IFG extending to the middle frontal gyrus (Table 2B).

### **Group Differences: OB vs LC**

#### *A1Win*

Group differences in the OB group, relative to the LC group, during the A1 winning phase showed diminished activity in the left posterior insula extending to the inferior parietal lobule; in the right precentral gyrus extending to the postcentral gyrus and insula; in the left precentral gyrus extending to the superior temporal gyrus, postcentral gyrus and insula; in the left cingulate gyrus extending bilaterally (Table 2C).

#### *A1Loss*

During the A1Loss phase, the OB group, relative to the LC group, demonstrated significantly increased activity in the right middle frontal gyrus in the OFC. The OB group demonstrated relatively decreased activity in the right insula extending to the postcentral gyrus; in the left medial frontal gyrus extending to the anterior cingulate and paracentral lobule; in the left precentral gyrus extending to the postcentral gyrus (Table 2C).

**Table S1.** Main Effects during MIDT ( $n = 57$ )

| MIDT<br>Phase                              | Structure                                                                                                                                                                                                                                                                                                                                                                                                                                                                                                                            | BA | Left/<br>Right | MNI<br>Coordinates |     |    | k     | t-value |
|--------------------------------------------|--------------------------------------------------------------------------------------------------------------------------------------------------------------------------------------------------------------------------------------------------------------------------------------------------------------------------------------------------------------------------------------------------------------------------------------------------------------------------------------------------------------------------------------|----|----------------|--------------------|-----|----|-------|---------|
|                                            |                                                                                                                                                                                                                                                                                                                                                                                                                                                                                                                                      |    |                | x                  | y   | z  |       |         |
| <b>A1 Winning&gt;</b><br><b>A1 Neutral</b> | Cingulate Gyrus/ Lentiform Nucleus/<br>Medial Frontal Gyrus/ Postcentral<br>Gyrus/ Superior Temporal Gyrus/<br>Thalamus/ Insula/ Caudate/<br>Precentral Gyrus/ Precuneus/ Inferior<br>Parietal Lobule/ Claustrum/<br>Midbrain Red Nucleus/ Superior<br>Frontal Gyrus/ Culmen/ Superior<br>Parietal Lobule/ Inferior Frontal<br>Gyrus/ Posterior Cingulate/ Middle<br>Frontal Gyrus/ Middle Temporal<br>Gyrus/ Transverse Temporal Gyrus/<br>Anterior Cingulate/ Superior<br>Occipital Gyrus/ Parahippocampal<br>Gyrus/ Lingual Gyrus | 40 | R              | 6                  | 15  | 36 | 24730 | 7.18    |
|                                            | Precentral Gyrus/ Middle Frontal<br>Gyrus/ Inferior Frontal Gyrus/<br>Superior Frontal Gyrus                                                                                                                                                                                                                                                                                                                                                                                                                                         | 6  | L              | -39                | 6   | 33 | 1248  | -5.52   |
|                                            | Middle Temporal Gyrus/ Superior<br>Temporal Gyrus                                                                                                                                                                                                                                                                                                                                                                                                                                                                                    | 22 | L              | -54                | -36 | -6 | 253   | -5.39   |
|                                            | Inferior Parietal Lobule/<br>Supramarginal Gyrus                                                                                                                                                                                                                                                                                                                                                                                                                                                                                     | 7  | L              | -39                | -63 | 54 | 620   | -4.68   |
| <b>A1 Losing&gt;</b><br><b>A1 Neutral</b>  | Precentral Gyrus/ Medial Frontal<br>Gyrus/ Lentiform Nucleus/<br>Thalamus/ Inferior Parietal Lobule/<br>Superior Frontal Gyrus/ Cingulate<br>Gyrus/ Culmen/ Precuneus/ Culmen/<br>Declive/ Superior Temporal Gyrus/<br>Midbrain Red Nucleus/ Inferior<br>Frontal Gyrus/ Middle Temporal<br>Gyrus/ Paracentral Lobule/ Insula/<br>Posterior Cingulate/ Cuneus/ Lingual<br>Gyrus/ Parahippocampal Gyrus/<br>Middle Frontal Gyrus/ Anterior<br>Cingulate/ Middle Occipital Gyrus                                                        | 4  | L              | -33                | -21 | 57 | 40024 | 7.96    |
| <b>A2 Winning&gt;</b><br><b>A2 Neutral</b> | Caudate/ Middle Temporal Gyrus/<br>Thalamus/ Cingulate Gyrus/<br>Precentral Gyrus/ Anterior Cingulate<br>Insula                                                                                                                                                                                                                                                                                                                                                                                                                      |    | L              | -24                | -48 | 18 | 2604  | 5.74    |
|                                            |                                                                                                                                                                                                                                                                                                                                                                                                                                                                                                                                      | 13 | R              | 42                 | 15  | -6 | 99    | 4.74    |

|                                                        |                                                                                                                                                                                                                                                                                                                                                                                                                               |    |   |     |     |     |       |       |
|--------------------------------------------------------|-------------------------------------------------------------------------------------------------------------------------------------------------------------------------------------------------------------------------------------------------------------------------------------------------------------------------------------------------------------------------------------------------------------------------------|----|---|-----|-----|-----|-------|-------|
|                                                        | Lentiform Nucleus/ Cingulate/<br>Orbital Gyrus/ Middle Frontal<br>Gyrus/ Superior Frontal Gyrus/<br>Middle Temporal Gyrus/ Cuneus/<br>Parahippocampal Gyrus/ Precuneus/<br>Posterior Cingulate/ Thalamus/<br>Uncus/ Insula/ Middle Occipital<br>Gyrus/ Postcentral Gyrus                                                                                                                                                      | 39 | L | -24 | 6   | -15 | 16826 | -6.27 |
|                                                        | Declive/ Pyramis                                                                                                                                                                                                                                                                                                                                                                                                              | -  | R | 12  | -78 | -27 | 290   | -4.05 |
| <b>A2 Losing&gt;<br/>A2 Neutral</b>                    | Thalamus/ Insula/ Cingulate Gyrus/<br>Superior Temporal Gyrus/ Caudate/<br>Precentral Gyrus/ Anterior Cingulate<br>Declive                                                                                                                                                                                                                                                                                                    | -  | L | -15 | -39 | 12  | 2459  | 6.20  |
|                                                        | Lingual Gyrus/ Middle Temporal<br>Gyrus/ Precuneus/ Superior Frontal<br>Gyrus/ Posterior Cingulate/ Middle<br>Frontal Gyrus/ Lentiform Nucleus/<br>Middle Occipital Gyrus/<br>Parahippocampal Gyrus/ Superior<br>Temporal Gyrus/ Insula/ Precentral<br>Gyrus/ Thalamus/ Medial Frontal<br>Gyrus/ Inferior Temporal Gyrus/<br>Midbrain Red Nucleus                                                                             | 18 | R | 15  | -51 | 3   | 15172 | -6.10 |
|                                                        | Middle Temporal Gyrus/ Superior<br>Temporal Gyrus/ Inferior Temporal<br>Gyrus                                                                                                                                                                                                                                                                                                                                                 | 21 | L | -66 | -12 | -12 | 283   | -4.56 |
| <b>Winning<br/>Outcome&gt;<br/>Neutral<br/>Outcome</b> | Middle Occipital Gyrus/ Medial<br>Frontal Gyrus/ Parahippocampal<br>Gyrus/ Middle Frontal Gyrus/<br>Precuneus/ Posterior Cingulate/<br>Cingulate Gyrus/ Middle Temporal<br>Gyrus/ Superior Frontal Gyrus/<br>Angular Gyrus/ Superior Occipital<br>Gyrus/ Postcentral Gyrus/ Lentiform<br>Nucleus/ Inferior Frontal Gyrus/<br>Superior Temporal Gyrus/ Fusiform<br>Gyrus/ Insula/ Thalamus/ Cuneus/<br>Inferior Temporal Gyrus | 19 | R | 42  | -87 | 21  | 9639  | 5.99  |
|                                                        | Postcentral Gyrus/ Insula                                                                                                                                                                                                                                                                                                                                                                                                     | 43 | L | -54 | -6  | 15  | 351   | 4.84  |
|                                                        | Culmen                                                                                                                                                                                                                                                                                                                                                                                                                        | -  | L | -9  | -60 | -24 | 92    | 3.84  |
|                                                        | Middle Temporal Gyrus                                                                                                                                                                                                                                                                                                                                                                                                         | 21 | L | -63 | -6  | -15 | 94    | 3.70  |
|                                                        | Caudate/ Inferior Frontal Gyrus/<br>Anterior Cingulate/ Thalamus/                                                                                                                                                                                                                                                                                                                                                             | -  | R | 24  | -21 | 33  | 1087  | -4.84 |



|                                           |                                                                                                                                                                                                                                      |    |   |     |     |     |      |       |
|-------------------------------------------|--------------------------------------------------------------------------------------------------------------------------------------------------------------------------------------------------------------------------------------|----|---|-----|-----|-----|------|-------|
|                                           | Precentral Gyrus/ Insula                                                                                                                                                                                                             |    |   |     |     |     |      |       |
|                                           | Thalamus/ Cingulate Gyrus/ Caudate                                                                                                                                                                                                   | -  | L | -24 | -33 | 9   | 462  | -4.19 |
|                                           | Inferior Frontal Gyrus/ Insula                                                                                                                                                                                                       | 9  | L | -57 | 33  | -6  | 321  | -4.11 |
| <b>Losing Outcome&gt; Neutral Outcome</b> | Medial Frontal Gyrus/ Superior Frontal Gyrus/ Anterior Cingulate                                                                                                                                                                     | 9  | R | 3   | 51  | 21  | 2080 | 5.69  |
|                                           | Middle Occipital Gyrus                                                                                                                                                                                                               | 19 | R | 42  | -84 | 18  | 177  | 5.45  |
|                                           | Inferior Frontal Gyrus                                                                                                                                                                                                               | 13 | L | -30 | 15  | -15 | 748  | 5.31  |
|                                           | Insula/ Superior Temporal Gyrus/ Inferior Frontal Gyrus/ Middle Frontal Gyrus                                                                                                                                                        | 13 | R | 33  | 15  | -9  | 543  | 4.95  |
|                                           | Superior Temporal Gyrus/ Middle Temple Gyrus                                                                                                                                                                                         | 39 | L | -63 | -60 | 27  | 396  | 3.86  |
|                                           | Cerebellum                                                                                                                                                                                                                           | -  | R | 3   | -57 | -36 | 156  | 4.41  |
|                                           | Middle Frontal Gyrus/ Precentral Gyrus                                                                                                                                                                                               | 8  | R | 45  | 27  | 45  | 190  | 4.39  |
|                                           | Cerebellum                                                                                                                                                                                                                           | -  | L | -27 | -78 | -39 | 186  | 4.27  |
|                                           | Superior Temporal Gyrus/ Middle Temporal Gyrus                                                                                                                                                                                       | 39 | R | 66  | -54 | 30  | 166  | 3.84  |
|                                           | Precuneus                                                                                                                                                                                                                            | 31 | R | 9   | -51 | 36  | 201  | 3.93  |
|                                           | Superior Temporal Gyrus/ Supramarginal Gyrus/ Middle Temporal Gyrus                                                                                                                                                                  | 39 | R | 66  | -54 | 30  | 188  | 3.70  |
|                                           | Middle Temporal Gyrus/ Superior Temporal Gyrus                                                                                                                                                                                       | 21 | R | 51  | -24 | -12 | 183  | 3.70  |
|                                           | Cuneus                                                                                                                                                                                                                               | 30 | R | 3   | -63 | 3   | 111  | 3.30  |
|                                           | Caudate/ Thalamus/ Inferior Frontal Gyrus/ Parahippocampal Gyrus/ Middle Temporal Gyrus/ Paracentral Lobule/ Posterior Cingulate/ Precentral Gyrus/ Medial Frontal Gyrus/ Superior Parietal Lobule/ Lingual Gyrus/ Postcentral Gyrus | -  | R | 24  | -24 | 33  | 4360 | -6.53 |

BA, Brodmann's area; L, left; MIDT, Monetary Incentive Delay Task; MNI, Montreal Neurological Institute; R, right.

k = voxel cluster size (each voxel = 3 mm<sup>3</sup>).

**Table S2.** Overlapping activity during MIDT Trials in BED and OB groups

| <b>BED + OB</b>   |                                                                                                                                                                                                        |           |                   |                        |          |          |          |                |
|-------------------|--------------------------------------------------------------------------------------------------------------------------------------------------------------------------------------------------------|-----------|-------------------|------------------------|----------|----------|----------|----------------|
| <b>MIDT Phase</b> | <b>Structure</b>                                                                                                                                                                                       | <b>BA</b> | <b>Left/Right</b> | <b>MNI Coordinates</b> |          |          | <b>k</b> | <b>t-value</b> |
|                   |                                                                                                                                                                                                        |           |                   | <b>x</b>               | <b>y</b> | <b>z</b> |          |                |
| <b>A1Win</b>      | Lingual Gyrus/ Thalamus/<br>Cuneus/ Parahippocampal<br>Gyrus/ Posterior<br>Cingulate/ Culmen                                                                                                           | 18        | L                 | -27                    | -57      | 3        | 1269     | -4.32          |
|                   | Superior Frontal Gyrus/<br>Medial Frontal Gyrus                                                                                                                                                        | 10        | L                 | -6                     | 63       | 30       | 136      | -3.98          |
|                   | Insula                                                                                                                                                                                                 | 13        | L                 | -39                    | -15      | 15       | 96       | -3.62          |
| <b>A1Loss</b>     | Lingual Gyrus/<br>Parahippocampal Gyrus/<br>Cuneus/ Thalamus/<br>Posterior Cingulate                                                                                                                   | 30        | L                 | -27                    | -54      | -3       | 978      | -4.17          |
| <b>A2Win</b>      | Inferior Temporal Gyrus/<br>Middle Occipital Gyrus                                                                                                                                                     | 18        | L                 | -51                    | -78      | -6       | 560      | -4.40          |
|                   | Cingulate Gyrus/ Middle<br>Frontal Gyrus/ Precentral<br>Gyrus/ Medial Frontal<br>Gyrus/ Inferior Parietal<br>Lobule/ Postcentral Gyrus/<br>Paracentral Lobule/<br>Precuneus/ Superior<br>Frontal Gyrus | 6         | L                 | -18                    | -12      | 66       | 3077     | -4.64          |
|                   | Precentral Gyrus/ Middle<br>Frontal Gyrus                                                                                                                                                              | 6         | L                 | -57                    | 9        | 36       | 223      | -4.10          |
|                   | Culmen/ Fusiform Gyrus/<br>Parahippocampal Gyrus                                                                                                                                                       | -         | R                 | 21                     | -51      | -15      | 345      | -4.01          |
|                   | Middle Temporal Gyrus                                                                                                                                                                                  | 39        | R                 | 54                     | -69      | 30       | 135      | -3.99          |
|                   | Precuneus/ Cuneus                                                                                                                                                                                      | 19        | L                 | -12                    | -82      | 43       | 188      | -3.76          |
|                   | Precuneus/ Posterior<br>Cingulate                                                                                                                                                                      | 31        | R                 | 3                      | -63      | 24       | 176      | -3.76          |
|                   | Insula/ Superior Temporal<br>Gyrus                                                                                                                                                                     | 13        | L                 | -51                    | -38      | 21       | 127      | -3.27          |
| <b>A2Loss</b>     | Precentral Gyrus/ Medial<br>Frontal Gyrus/ Superior<br>Temporal Gyrus/<br>Postcentral Gyrus/<br>Cingulate Gyrus/                                                                                       | 4         | L                 | -24                    | -21      | 66       | 4775     | -5.06          |

|               |                                                                                                                                                                                                                                                            |    |   |     |     |     |      |       |
|---------------|------------------------------------------------------------------------------------------------------------------------------------------------------------------------------------------------------------------------------------------------------------|----|---|-----|-----|-----|------|-------|
|               | Paracentral Lobule/<br>Inferior Parietal Lobule/<br>Middle Frontal Gyrus/<br>Parahippocampal Gyrus/<br>Fusiform Gyrus/ Superior<br>Parietal Lobule/<br>Precuneus/ Thalamus/<br>Posterior Cingulate                                                         |    |   |     |     |     |      |       |
|               | Insula/ Superior Temporal<br>Gyrus                                                                                                                                                                                                                         | 13 | L | -36 | -15 | 15  | 161  | -3.70 |
|               | Inferior Frontal Gyrus/<br>Middle Frontal Gyrus/<br>Superior Frontal Gyrus                                                                                                                                                                                 | 9  | L | -54 | 12  | 30  | 238  | -3.56 |
| <b>OCWin</b>  | Inferior Occipital Gyrus/<br>Fusiform Gyrus/ Middle<br>Occipital Gyrus/ Lingual<br>Gyrus/ Cuneus/ Precuneus                                                                                                                                                | 18 | L | -42 | -84 | -6  | 2599 | 5.28  |
|               | Inferior Frontal Gyrus                                                                                                                                                                                                                                     | 9  | L | -45 | 9   | 30  | 160  | 5.26  |
|               | Posterior Cingulate/<br>Parahippocampal Gyrus/<br>Middle Temporal Gyrus/<br>Precentral Gyrus/<br>Postcentral Gyrus/ Inferior<br>Parietal Lobule/ Insula/<br>Medial Frontal Gyrus/<br>Caudate/ Precuneus/<br>Anterior Cingulate/<br>Superior Temporal Gyrus | 29 | L | -18 | -42 | 9   | 4761 | -5.04 |
|               | Culmen of Vermis/<br>Culmen                                                                                                                                                                                                                                | -  | R | 3   | -66 | -15 | 710  | -4.29 |
|               | Insula/ Superior Temporal<br>Gyrus                                                                                                                                                                                                                         | 13 | R | 42  | 6   | -12 | 183  | -3.12 |
| <b>OCLoss</b> | Inferior Occipital Gyrus/<br>Lingual Gyrus/ Cuneus/<br>Middle Occipital Gyrus/<br>Fusiform Gyrus/ Superior<br>Parietal Lobule/ Precuneus                                                                                                                   | 18 | L | -42 | -84 | -9  | 2161 | 4.87  |
|               | Paracentral Lobule/<br>Medial Frontal Gyrus/<br>Precentral Gyrus/<br>Postcentral Gyrus/<br>Precuneus/ Superior<br>Temporal Gyrus/ Insula/<br>Cingulate Gyrus/                                                                                              | 7  | R | 21  | -42 | 63  | 9131 | -6.35 |

Parahippocampal Gyrus/  
Inferior Parietal Lobule

|                   |   |   |   |     |     |     |       |
|-------------------|---|---|---|-----|-----|-----|-------|
| Culmen of Vermis/ | - | L | 3 | -66 | -15 | 890 | -4.23 |
| Culmen/ Declive   |   |   |   |     |     |     |       |

---

BA, Brodmann's area; BED, binge eating disorder; L, left; MIDT, Monetary Incentive Delay Task; MNI, Montreal Neurological Institute; OB, obese; R, right.  
k = voxel cluster size (each voxel = 3 mm<sup>3</sup>).

## Supplemental References

1. First MB (2002): The DSM series and experience with DSM-IV. *Psychopathology* 35:67-71.
2. Andrews MM, Meda SA, Thomas AD, Potenza MN, Krystal JH, Worhunsky P, *et al.* (2010): Individuals family history positive for alcoholism show functional magnetic resonance imaging differences in reward sensitivity that are related to impulsivity factors. *Biol Psychiatry* 69:675-683.
3. Knutson B, Fong GW, Adams CM, Varner JL, Hommer D (2001): Dissociation of reward anticipation and outcome with event-related fMRI. *Neuroreport* 12:3683-3687.
